# Supplementary material for: Development of a magnetic dispersive micro-solid-phase extraction method based on a deep eutectic solvent as a carrier for the rapid determination of meloxicam in biological samples
Source: Royal Society of Chemistry journal article supplement (doi:10.1039/d0ay00095g), 2020-01-01
Supplement: d0ay00095g6.pdf [file d0ay00095g6.pdf]

**Caption of Figures:**

Figure. S1. Effects of sample pH on zeta potential and extraction efficiency

Figure. S2. SEM image of SiO<sub>2</sub>@Fe<sub>3</sub>O<sub>4</sub> magnetic nanoparticles

Figure. S3. XRD pattern of SiO<sub>2</sub>@Fe<sub>3</sub>O<sub>4</sub> magnetic nanoparticles

Figure. S4. BET adsorption plot of SiO<sub>2</sub>@Fe<sub>3</sub>O<sub>4</sub> magnetic nanoparticles

Figure. S5. Response surface plot of desorption time VS. amount of adsorbent
