# Supplementary material for: Development of a magnetic dispersive micro-solid-phase extraction method based on a deep eutectic solvent as a carrier for the rapid determination of meloxicam in biological samples
Source: Royal Society of Chemistry journal article supplement (doi:10.1039/d0ay00095g), 2020-01-01
Supplement: d0ay00095g7.pdf [file d0ay00095g7.pdf]

**Table S1.** The experimental factors, levels, design matrix and response of fractional factorial design

| <b>factors (symbols)</b>              | <b>Low (-1)</b> | <b>High (+1)</b> |
|---------------------------------------|-----------------|------------------|
| Amount of adsorbent (mg) (A)          | 2               | 8                |
| Amount of salt (%W/V-NaCl) (B)        | 0               | 1                |
| pH of sample solution (C)             | 4               | 8                |
| Extraction time (min) (D)             | 1               | 10               |
| Desorption time (min) (E)             | 5               | 10               |
| Volume of desorption solvent (µL) (F) | 200             | 500              |

  

| Numbers | Parameters |    |    |    |    |    | Peak area |
|---------|------------|----|----|----|----|----|-----------|
|         | A          | B  | C  | D  | E  | F  |           |
| 1       | -1         | 1  | 1  | 1  | -1 | 1  | 111.00    |
| 2       | 1          | 1  | 1  | -1 | 1  | -1 | 53.000    |
| 3       | -1         | 1  | -1 | 1  | 1  | -1 | 59.000    |
| 4       | 1          | -1 | -1 | 1  | 1  | 1  | 53.000    |
| 5       | 1          | 1  | -1 | -1 | -1 | 1  | 101.00    |
| 6       | -1         | -1 | 1  | 1  | 1  | -1 | 56.000    |
| 7       | -1         | -1 | -1 | 1  | -1 | 1  | 115.00    |
| 8       | 1          | -1 | 1  | -1 | -1 | 1  | 105.00    |
| 9       | 1          | 1  | 1  | 1  | 1  | 1  | 45.700    |
| 10      | 1          | -1 | -1 | -1 | 1  | -1 | 45.060    |
| 11      | 1          | 1  | -1 | 1  | -1 | -1 | 109.41    |
| 12      | 1          | -1 | 1  | 1  | -1 | -1 | 100.00    |
| 13      | -1         | -1 | 1  | -1 | 1  | 1  | 65.000    |
| 14      | -1         | 1  | -1 | -1 | 1  | 1  | 51.000    |
| 15      | -1         | -1 | -1 | -1 | -1 | -1 | 129.00    |
| 16      | -1         | 1  | 1  | -1 | -1 | -1 | 121.00    |
