# Supplementary material for: Development of a magnetic dispersive micro-solid-phase extraction method based on a deep eutectic solvent as a carrier for the rapid determination of meloxicam in biological samples
Source: Royal Society of Chemistry journal article supplement (doi:10.1039/d0ay00095g), 2020-01-01
Supplement: d0ay00095g8.pdf [file d0ay00095g8.pdf]

**Table S2.** Main factors, symbols, levels, design matrix and experimental results for the optimization of amount of adsorbent and desorption time by CCD

| <b>Factors (symbols)</b> | <b>Low (-1)</b> | <b>Central (0)</b> | <b>High (+1)</b> |
|--------------------------|-----------------|--------------------|------------------|
| Amount of adsorbent (A)  | 2               | 4                  | 6                |
| Desorption time (E)      | 2               | 3.5                | 5                |

  

| <b>Numbers</b> | <b>Parameters</b> |          | <b>Peak area</b> |
|----------------|-------------------|----------|------------------|
|                | <b>A</b>          | <b>E</b> |                  |
| 1              | 0                 | 0        | 164              |
| 2              | 1                 | 1        | 122              |
| 3              | 0                 | 1        | 130              |
| 4              | -1                | 0        | 163              |
| 5              | 0                 | -1       | 185              |
| 6              | -1                | -1       | 190              |
| 7              | 0                 | 0        | 160              |
| 8              | 1                 | 0        | 144              |
| 9              | 0                 | 0        | 158              |
| 10             | -1                | 1        | 142              |
| 11             | 0                 | 0        | 159              |
| 12             | 0                 | 0        | 159              |
| 13             | 1                 | -1       | 173              |
