# Supplementary material for: Development of a magnetic dispersive micro-solid-phase extraction method based on a deep eutectic solvent as a carrier for the rapid determination of meloxicam in biological samples
Source: Royal Society of Chemistry journal article supplement (doi:10.1039/d0ay00095g), 2020-01-01
Supplement: d0ay00095g9.pdf [file d0ay00095g9.pdf]

Table S3. Effect of interfering species on the determination of meloxicam

| Species                          | Tolerance limit (w/w) |
|----------------------------------|-----------------------|
| Sodium, Potassium, Calcium       | 250                   |
| Urea, Thiourea, Glucose, Sucrose | 1000                  |
