# Supplementary material for: Development of a magnetic dispersive micro-solid-phase extraction method based on a deep eutectic solvent as a carrier for the rapid determination of meloxicam in biological samples
Source: Royal Society of Chemistry journal article supplement (doi:10.1039/d0ay00095g), 2020-01-01
Supplement: d0ay00095g10.pdf [file d0ay00095g10.pdf]

**Table S4.** Comparison of the M-D- $\mu$ SPE-DES method followed by HPLC-UV with other methods for extraction and determination of MEL

| Methods                                 | Real sample            | LDR ( $\mu\text{g L}^{-1}$ ) | LOD ( $\mu\text{g L}^{-1}$ ) | RSD% (intra-day) | Extraction time (min) | ER (%) | Ref.          |
|-----------------------------------------|------------------------|------------------------------|------------------------------|------------------|-----------------------|--------|---------------|
| CPE-HPLC-UV <sup>a</sup>                | Human serum            | 45-2000                      | 10                           | <15.0            | 10                    | >92.0  | [26]          |
| SPE-HPLC-UV <sup>b</sup>                | Human serum            | 10-10000                     | 3                            | <5.0             | -                     | >93.0  | [27]          |
| IL-UA-ISFME-HPLC-UV <sup>c</sup>        | Human plasma           | 5-1500                       | 1                            | 3.6              | 4.5                   | >82.1  | [28]          |
| LLE-HPLC-UV <sup>d</sup>                | Human plasma           | 10-2400                      | -                            | <4.3             | -                     | >77.2  | [29]          |
| M-D- $\mu$ SPE-DES-HPLC-UV <sup>e</sup> | Human plasma and urine | 10-500                       | 1.5-3.0                      | <6.2             | 3                     | >92.0  | Present study |

<sup>a</sup> Cloud point extraction- high performance liquid chromatography–ultra violet detection

<sup>b</sup> Liquid-liquid extraction- high performance liquid chromatography–ultra violet detection

<sup>c</sup> Solid phase extraction- high performance liquid chromatography–ultra violet detection

<sup>d</sup> Ionic liquid based ultrasound assisted in situ solvent formation microextraction- high performance liquid chromatography–ultra violet detection

<sup>e</sup> Magnetic dispersive micro solid phase extraction technique based on deep eutectic solvent- high performance liquid chromatography–ultra violet detection
