# Supplementary figures and images for: Development of a magnetic dispersive micro-solid-phase extraction method based on a deep eutectic solvent as a carrier for the rapid determination of meloxicam in biological samples
Source: Royal Society of Chemistry journal article supplement (doi:10.1039/d0ay00095g), 2020-01-01

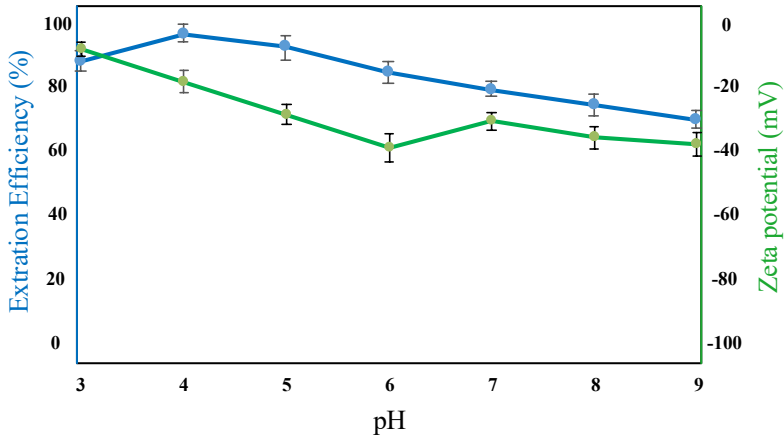

Supplement: d0ay00095g1.pdf [file d0ay00095g1.pdf]

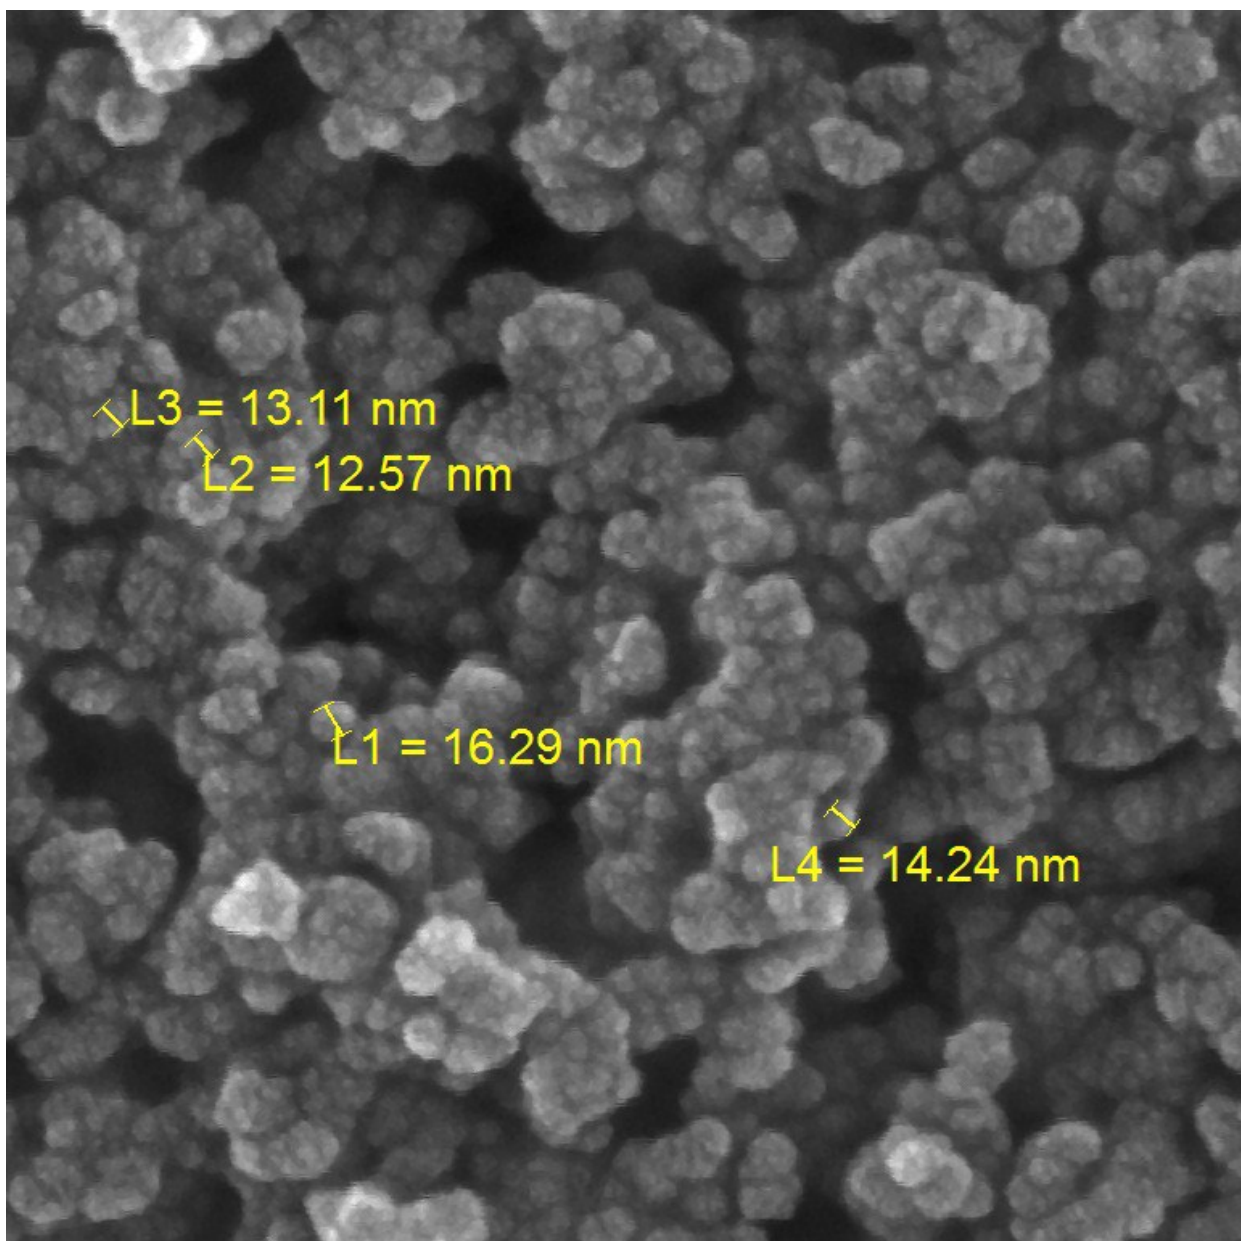

|                      |                       |                                                                                     |                                                                                            |
|----------------------|-----------------------|-------------------------------------------------------------------------------------|--------------------------------------------------------------------------------------------|
| SEM HV: 15.0 kV      | WD: 3.94 mm           |  | MIRA3 TESCAN                                                                               |
| SEM MAG: 350 kx      | Det: In-Beam SE       |                                                                                     | 100 nm                                                                                     |
| View field: 0.593 μm | Date(m/d/y): 04/28/18 |                                                                                     | RMRC  |

Supplement: d0ay00095g2.pdf [file d0ay00095g2.pdf]

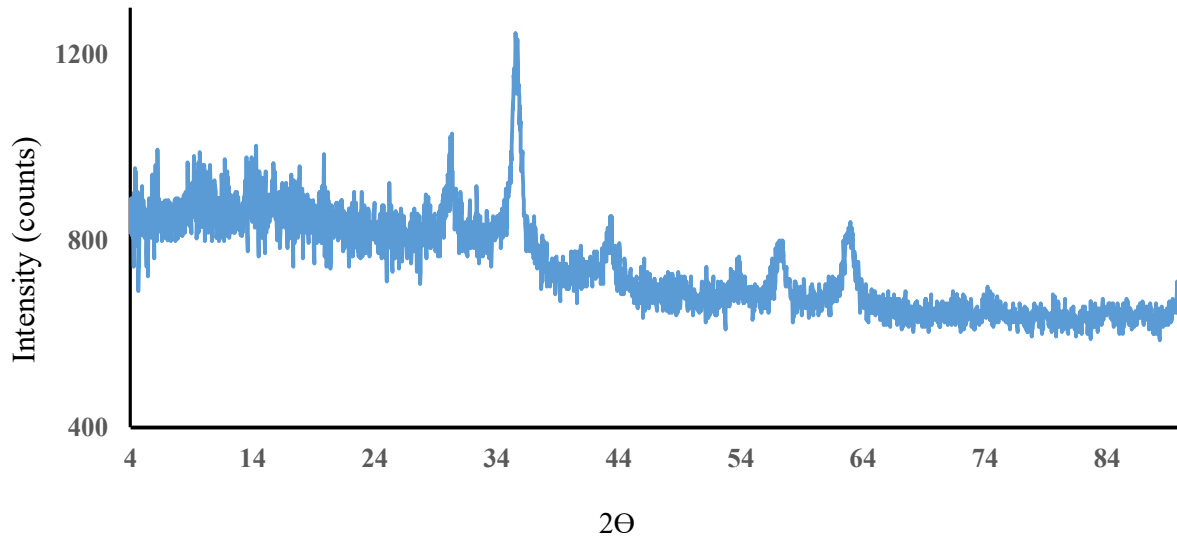

Supplement: d0ay00095g3.pdf [file d0ay00095g3.pdf]

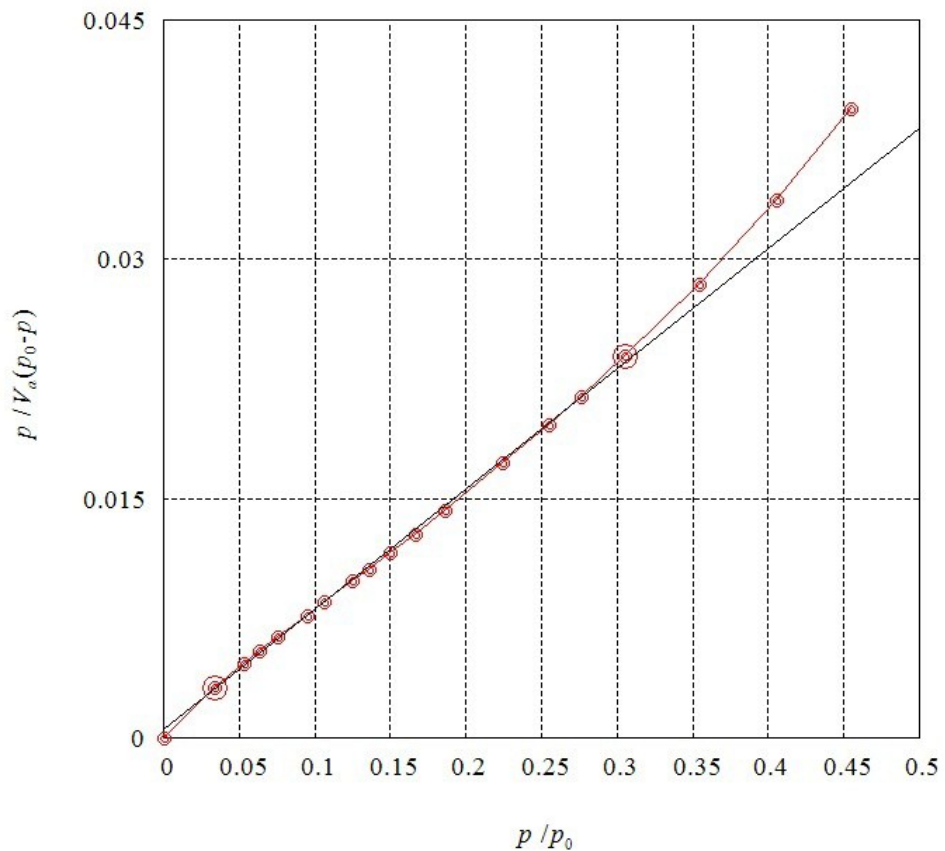

BET-Plot

Supplement: d0ay00095g4.pdf [file d0ay00095g4.pdf]

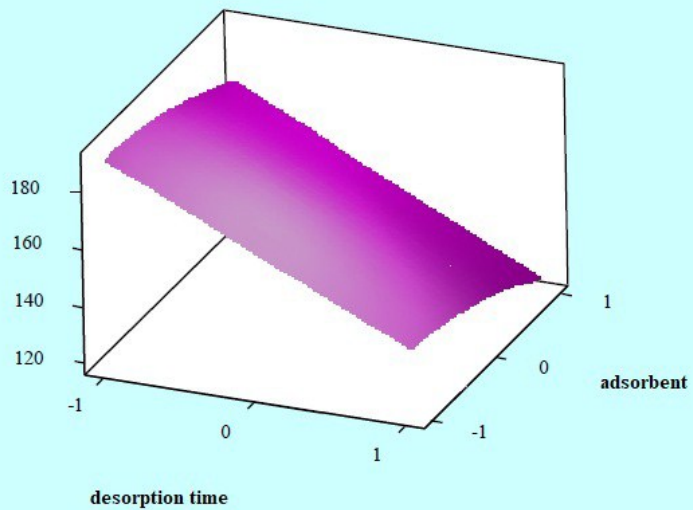

Supplement: d0ay00095g5.pdf [file d0ay00095g5.pdf]
